# Supplementary material for: Cation-mediated optical resolution and anticancer activity of chiral polyoxometalates built from entirely achiral building blocks
Source: Royal Society of Chemistry journal article supplement (doi:10.1039/c5sc04408a), 2016-01-01
Supplement: c5sc04408a1.pdf [file c5sc04408a1.pdf]

## Supporting Information

### **Cation-mediated optical resolution and anticancer activity of chiral polyoxometalates built from entirely achiral building blocks**

Zhi-Ming Zhang,<sup>a,b,c,†</sup> Xiaopin Duan,<sup>b,†</sup> Shuang Yao,<sup>b</sup> Zhishu Wang,<sup>a</sup> Zekai Lin,<sup>b</sup> Yang-Guang Li,<sup>a</sup> La-Sheng Long,<sup>c</sup> En-Bo Wang<sup>a,\*</sup>, and Wenbin Lin<sup>b,c,\*</sup>

<sup>a</sup>*Key Laboratory of Polyoxometalate Science of Ministry of Education, Faculty of Chemistry, Northeast Normal University, Ren Min Street No.5268, Changchun, Jilin 130024, (P. R. China); E-mail: wangeb889@nenu.edu.cn*

<sup>b</sup>*Department of Chemistry, University of Chicago, 929 E. 57th Street, Chicago, Illinois 60637, United States; E-mail: wenbinlin@uchicago.edu*

<sup>c</sup>*Collaborative Innovation Center of Chemistry for Energy Materials, Xiamen University, Xiamen 361005, P.R. China*

#### **CONTENTS**

|                  |                                                 |                |
|------------------|-------------------------------------------------|----------------|
| <b>Section 1</b> | <b>Crystal Data</b>                             | <b>S2</b>      |
| <b>Section 2</b> | <b>Supplementary Structural Figures</b>         | <b>S3-S5</b>   |
| <b>Section 3</b> | <b>Supplementary Physical Characterizations</b> | <b>S6-S7</b>   |
| <b>Section 4</b> | <b>Stability Study</b>                          | <b>S8-S9</b>   |
| <b>Section 4</b> | <b>Anticancer Activity Study</b>                | <b>S10-S17</b> |

## Section 1 Crystal Data

**Table S1** Crystal Data and Structure Refinement for **1** and **2**

|                                                                                                                       | <b>1</b>                                                                                                            | <b>2</b>                                                                                                          |
|-----------------------------------------------------------------------------------------------------------------------|---------------------------------------------------------------------------------------------------------------------|-------------------------------------------------------------------------------------------------------------------|
| Empirical formula                                                                                                     | C <sub>60</sub> H <sub>235</sub> ClCo <sub>4</sub> N <sub>49</sub> O <sub>133</sub> Sb <sub>9</sub> W <sub>24</sub> | C <sub>48</sub> H <sub>209</sub> Co <sub>5</sub> N <sub>40</sub> O <sub>135</sub> Sb <sub>9</sub> W <sub>24</sub> |
| <i>M</i>                                                                                                              | 9281.05                                                                                                             | 9310.35                                                                                                           |
| $\lambda/\text{\AA}$                                                                                                  | 0.41328                                                                                                             | 0.71073                                                                                                           |
| <i>T</i> /K                                                                                                           | 100(2)                                                                                                              | 293(2)                                                                                                            |
| Crystal dimensions/mm                                                                                                 | 0.22 × 0.21 × 0.06                                                                                                  | 0.31 × 0.31 × 0.31                                                                                                |
| Crystal system                                                                                                        | Monoclinic                                                                                                          | Cubic                                                                                                             |
| Space group                                                                                                           | <i>P</i> 2(1)/c                                                                                                     | <i>P</i> 2(1)3                                                                                                    |
| <i>a</i> /\AA                                                                                                         | 21.9241(13)                                                                                                         | 27.14990(10)                                                                                                      |
| <i>b</i> /\AA                                                                                                         | 26.1040(15)                                                                                                         | 27.14990(10)                                                                                                      |
| <i>c</i> /\AA                                                                                                         | 42.1665(19)                                                                                                         | 27.14990(10)                                                                                                      |
| $\beta/^\circ$                                                                                                        | 119.618(2)                                                                                                          | 90                                                                                                                |
| <i>V</i> /\AA <sup>3</sup>                                                                                            | 20979(2)                                                                                                            | 20012.66(13)                                                                                                      |
| <i>Z</i>                                                                                                              | 4                                                                                                                   | 4                                                                                                                 |
| <i>D<sub>c</sub></i> /Mg m <sup>-3</sup>                                                                              | 3.024                                                                                                               | 3.090                                                                                                             |
| $\mu/\text{mm}^{-1}$                                                                                                  | 3.274                                                                                                               | 15.428                                                                                                            |
| <i>F</i> (000)                                                                                                        | 17448                                                                                                               | 16908                                                                                                             |
| $\theta$ Range/ $^\circ$                                                                                              | 0.64–15.81                                                                                                          | 3.00–24.99                                                                                                        |
| Data/restraints/parameters                                                                                            | 50185 / 322 / 2371                                                                                                  | 11180/143/737                                                                                                     |
| $R_1(I > 2\sigma(I))^a$                                                                                               | 0.0454                                                                                                              | 0.0615                                                                                                            |
| $wR_2$ (all data) <sup>a</sup>                                                                                        | 0.1562                                                                                                              | 0.1240                                                                                                            |
| Goodness-of-fit on $F^2$                                                                                              | 0.970                                                                                                               | 1.053                                                                                                             |
| <sup>a</sup> $R_1 = \sum   F_0  -  F_C   / \sum  F_0 $ ; $wR_2 = \sum [w(F_0^2 - F_C^2)^2] / \sum [w(F_0^2)^2]^{1/2}$ |                                                                                                                     |                                                                                                                   |

## Section 2 Supplementary Structural Figures

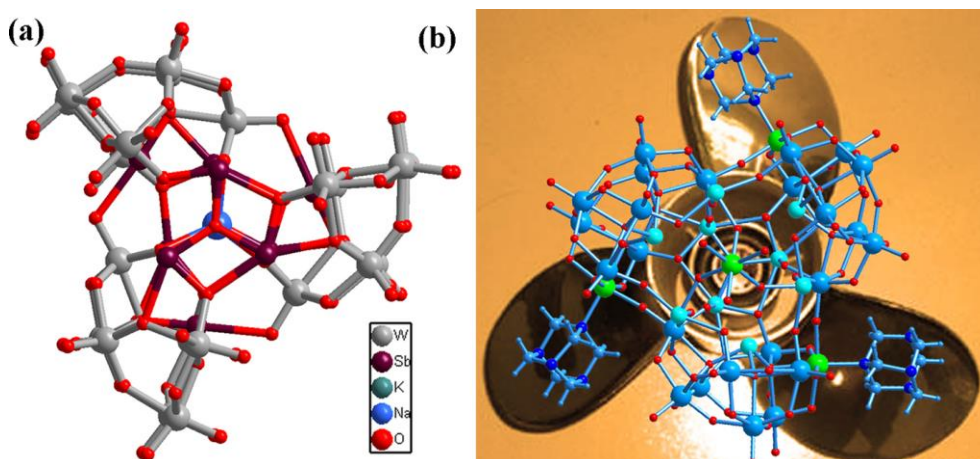

**Fig. S1** (a) Ball-and-stick representation of  $[\text{NaSb}_9\text{W}_{21}\text{O}_{86}]^{18-}$ ; (b) ball-and-stick representation of the screw propeller-like molecular capsule in **1** and **2**.

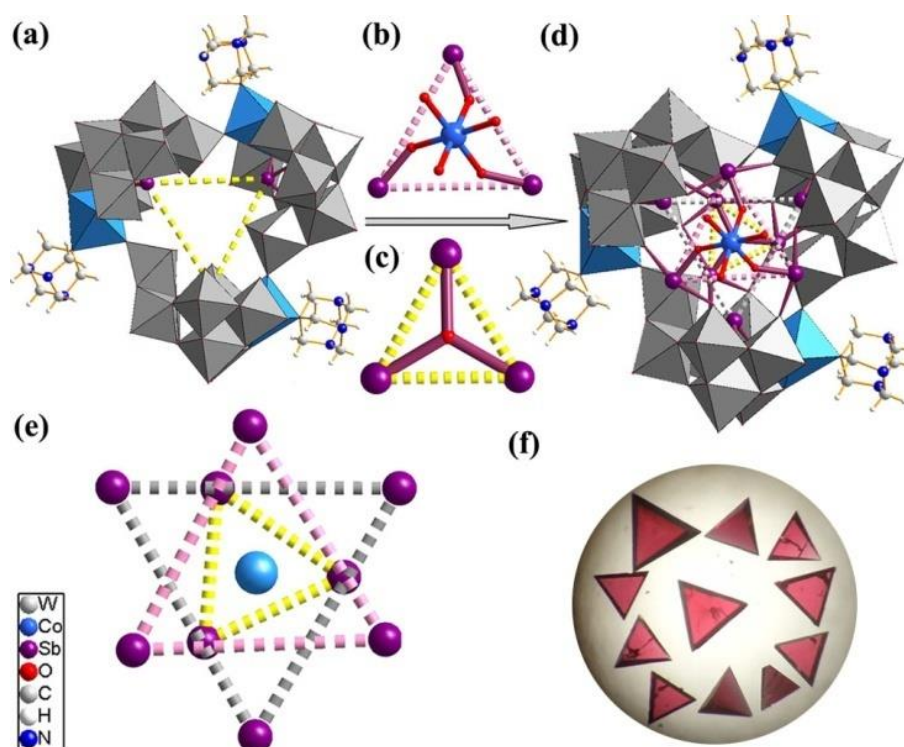

**Fig. S2** (a) Triangular structure composed of three  $[\beta\text{-Co(hmta)SbW}_8\text{O}_{32}]$  units; (b)  $\{\text{Sb}_3\text{Co}\}$  group capping at the top of the capsule; (c)  $\{\text{Sb}_3\}$  group located at the bottom of the capsule; (d) view of the chiral polyoxotungstate cluster; (e) schematic view of the three triangular units in a chiral microanion; (f) optical micrograph of a single crystal of  $\Lambda\text{-2}$ .

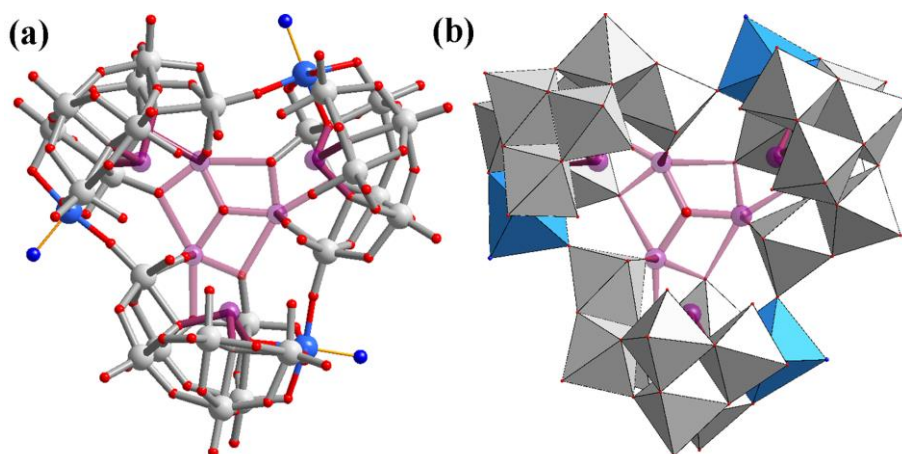

**Fig. S3** The cryptate shell chiral polyoxoanion.

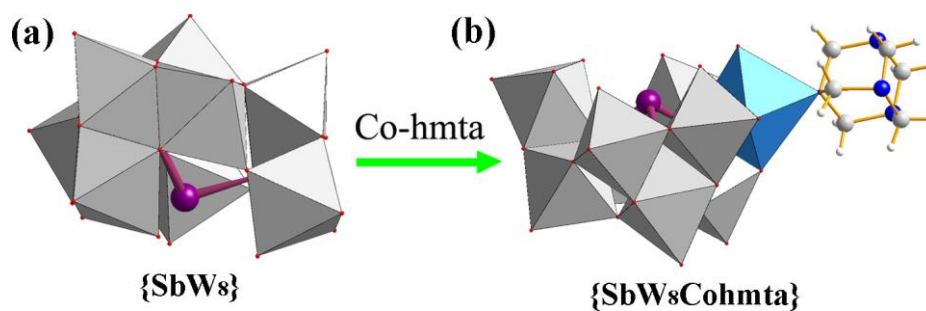

**Fig. S4** (a) The tetravalent tungstoantimonate  $\{\text{SbW}_8\text{O}_{31}\}$  unit and (b) the Co-hmta-substituted  $\{\text{SbW}_8\text{O}_{31}\}$  subunit in **1** and **2**.

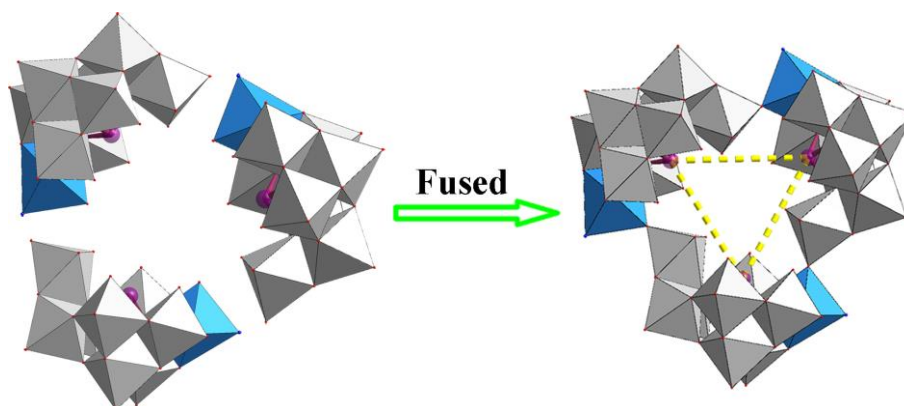

**Fig. S5** Three Co-substituted  $\{\text{SbW}_8\text{O}_{31}\}$  units were fused together to constitute a triangular shell.

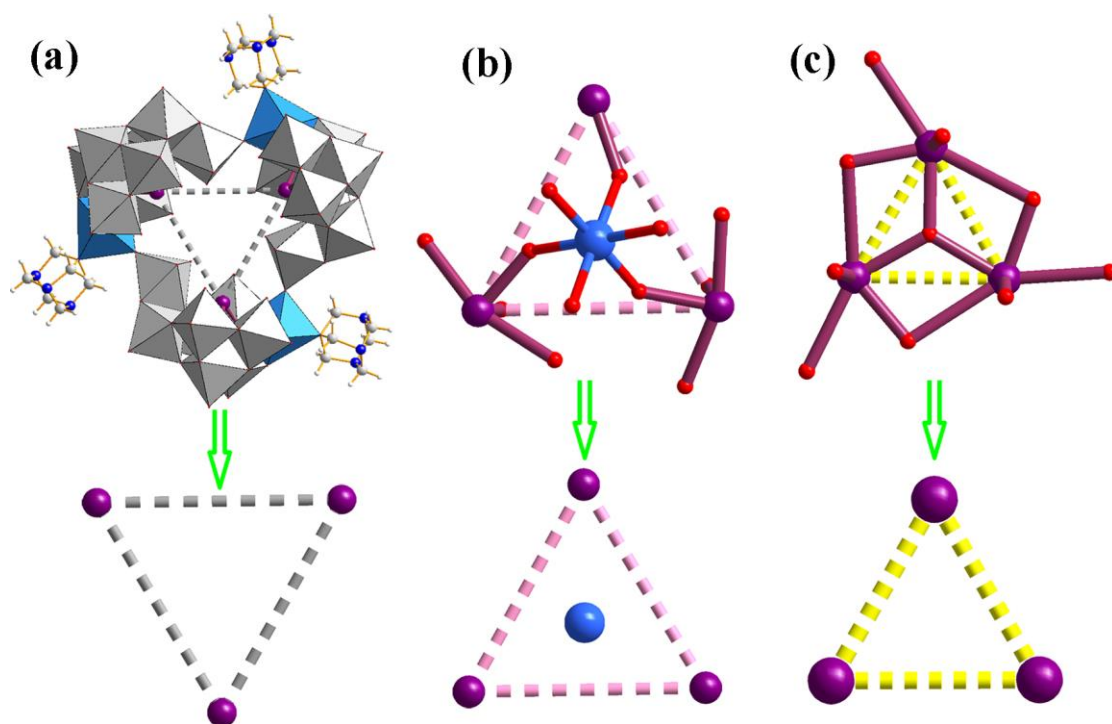

**Fig. S6** The triangular groups in the chiral polyoxoanion.

### Section 3 Supplementary Physical Characterizations

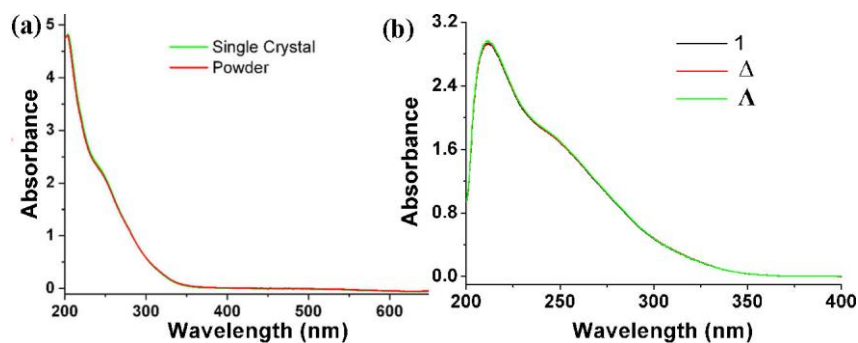

**Fig. S7** (a) UV-Vis spectra of **2** for one single-crystal and bulk sample at similar concentrations; (b) UV-Vis spectra of achiral **1**,  $\Delta$ -**2**, and  $\Lambda$ -**2** in aqueous solution at similar concentrations.

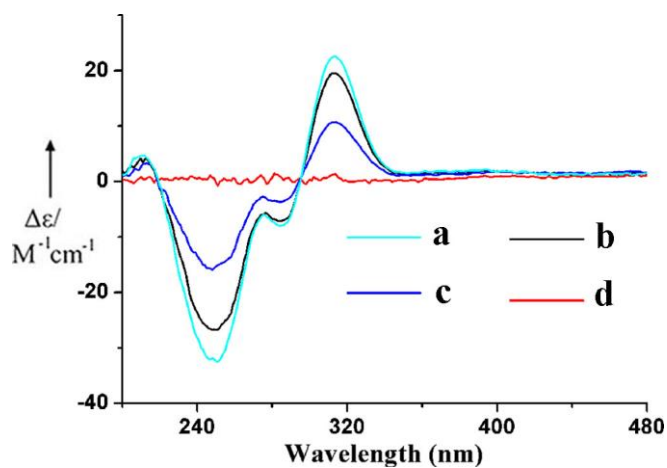

**Fig. S8** (a) CD spectra of a chiral single crystal; (b) and (c) powder samples obtained during a fast crystallization process; (d) CD spectrum of the racemic solution after the reaction.

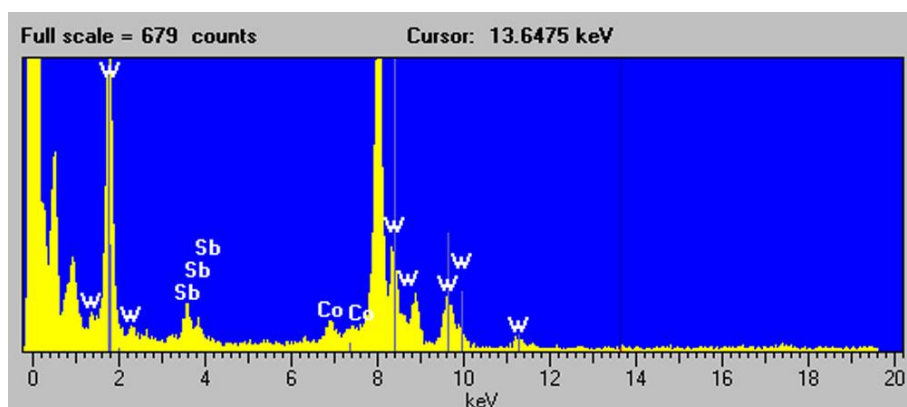

**Fig. S9** Energy-dispersive X-ray (EDX) analysis of  $\Delta$ -**2**.

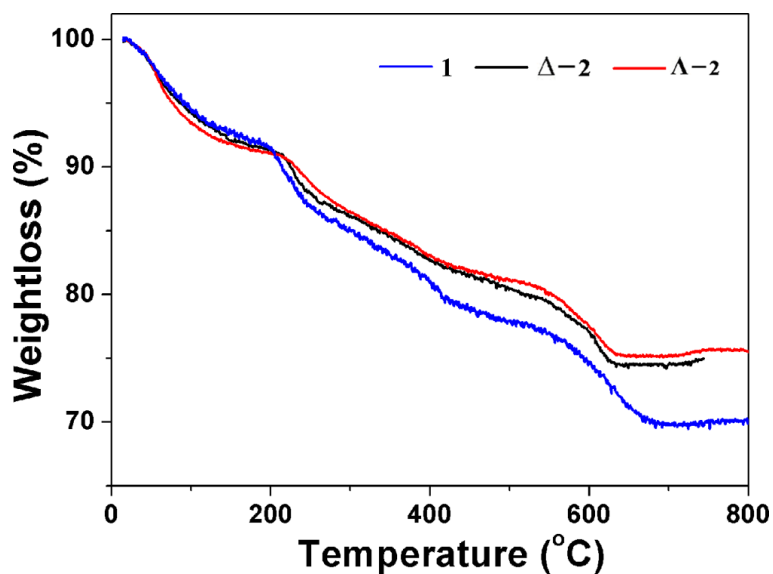

**Fig. S10** The TG curve of compounds **1**,  $\Delta$ -**2**, and  $\Lambda$ -**2**. In these TG curves, there are three continual weight losses in the temperature range of  $\sim$ 25-700  $^{\circ}\text{C}$ . The first weight losses of 8.50% (**1**) and 8.65% ( $\Delta$ -**2** and  $\Lambda$ -**2**) in the temperature range of  $\sim$ 25-200  $^{\circ}\text{C}$  are attributed to the loss of water molecules counter to the ammonium ions. The weight losses of 14.70% (**1**), 12.05% ( $\Delta$ -**2**), and 11.20% ( $\Lambda$ -**2**) in the temperature range of  $\sim$ 200-550  $^{\circ}\text{C}$  are attributed to the loss of noncoordinated and coordinated hmta molecules (calcd. 14.78% for **1**, 12.13% for  $\Delta$ -**2** and  $\Lambda$ -**2**).

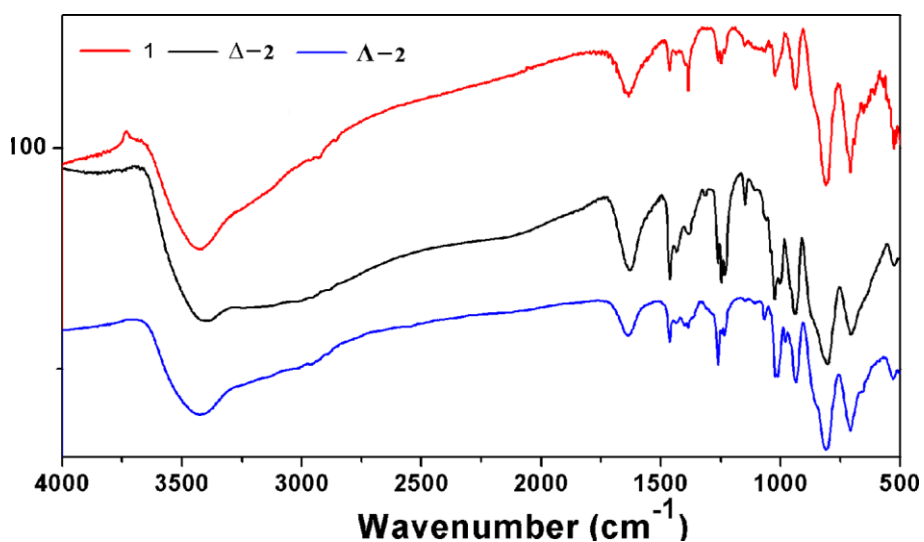

**Fig. S11** IR spectra for compounds **1**,  $\Delta$ -**2**, and  $\Lambda$ -**2**. The IR spectra of  $\Delta$ -**2** and  $\Lambda$ -**2** are similar to each other, which could help to confirm the structural similarity of these two compounds.



## Section 4 Stability Study

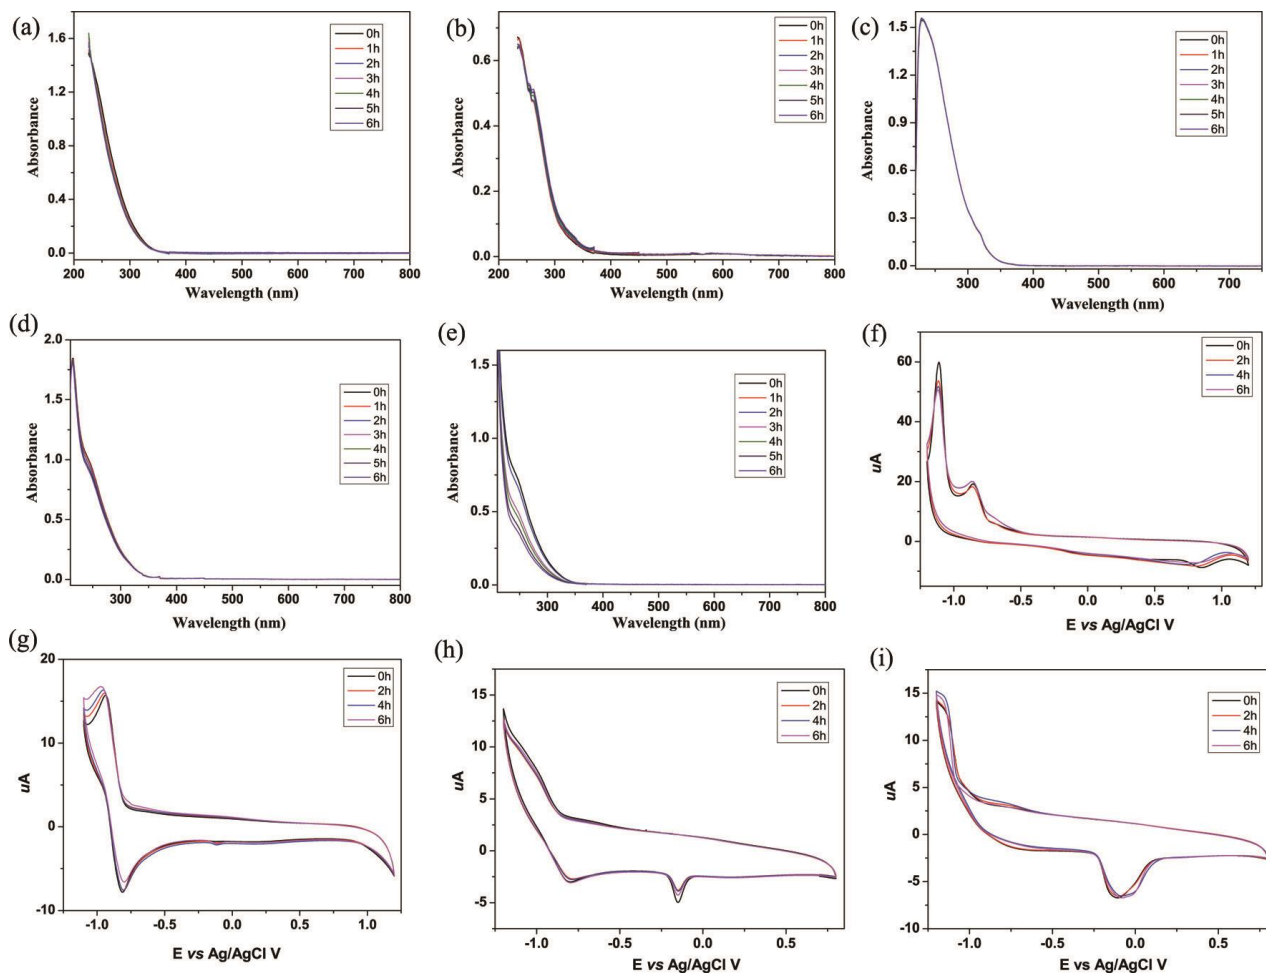

**Fig. S12** UV-Vis spectra of **2** in pH 5 (a), pH 6 (b), pH 7 (c), pH 8 (d) and pH 9 (e) buffer solutions. UV-Vis curves were detected every hour for six hours; cyclic voltammograms of **2** ( $2.5 \times 10^{-4}$  M) in pH 5 (f), pH 6 (g), pH 7 (h) and pH 8 (i) buffer solutions. The CV curves were detected every two hours for a total of four times in eight hours.



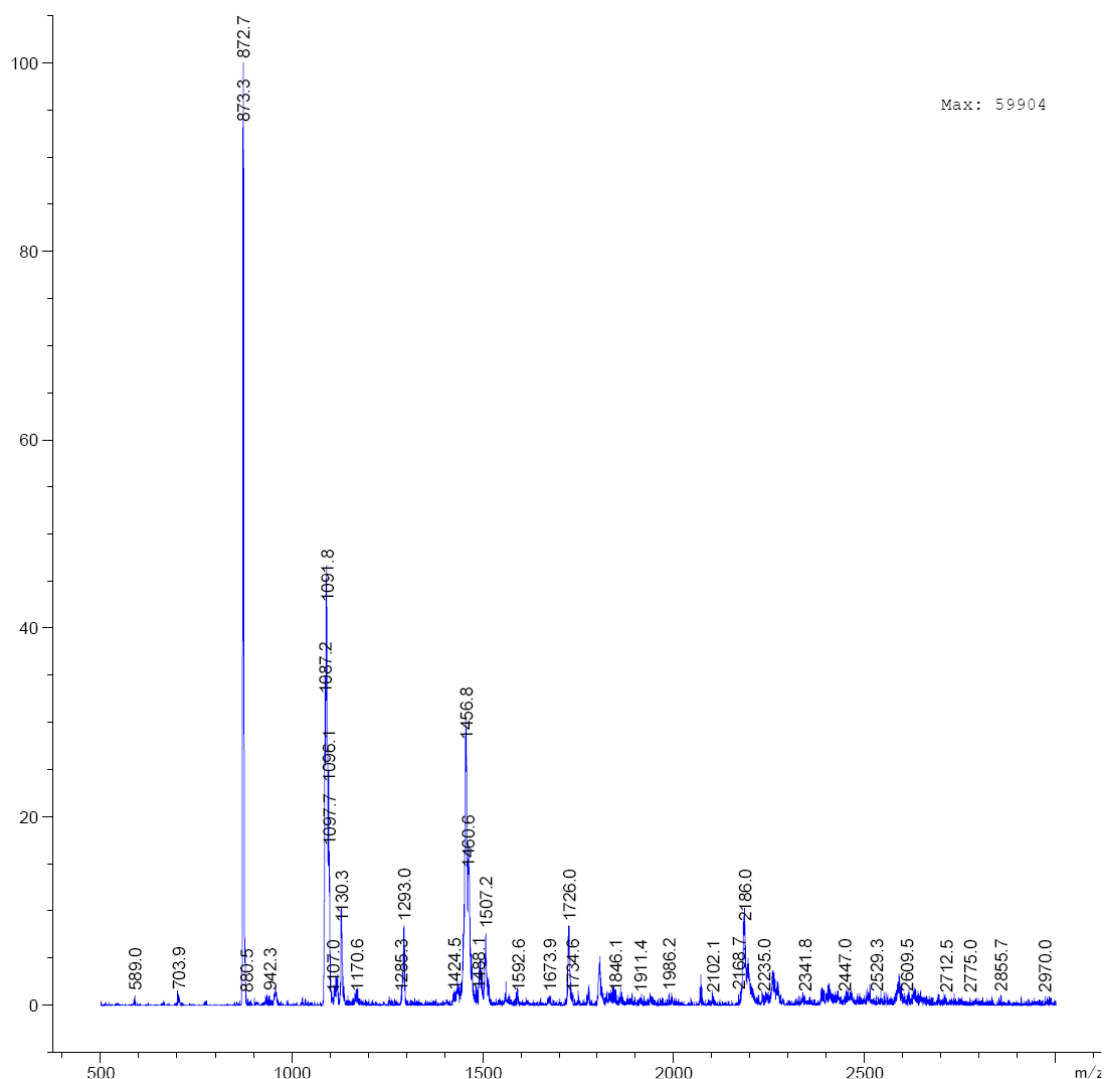

**Fig. S13** ESI-MS spectra obtained for **1** dissolved in a pH 7 solution and aged for 24 hours.

**Table S2** *M/Z* peak assignments in the ESI-MS spectra of **1**.

| Peak assignments                                                                                                      | Observed m/z | Calculated m/z |
|-----------------------------------------------------------------------------------------------------------------------|--------------|----------------|
| $[\text{Na}_3\text{HPOM}]^{10-}$                                                                                      | 873.3        | 873.1          |
| $[(\text{Hmta})_6\text{POM}]^{8-}(\text{CH}_3\text{OH})_3$                                                            | 1091.8       | 1091.4         |
| $[\text{K}_3(\text{L}_2)\text{Co}_4\text{P}_2\text{W}_{18}\text{O}_{68}]^{5-}(\text{CH}_3\text{OH})_2(\text{DMSO})_2$ | 1096.7       | 1096.1         |
| $[\text{H}_8\text{POM}]^{6-} \cdot 2\text{H}_2\text{O}$                                                               | 1293.0       | 1293.3         |
| $[(\text{Hmta})_8\text{POM}]^{6-}(\text{CH}_3\text{CN})_4$                                                            | 1507.2       | 1506.9         |
| $[(\text{Hmta})_5\text{Na}_4\text{POM}]^{5-}(\text{CH}_3\text{CN})$                                                   | 1726.0       | 1725.5         |
| $[(\text{Hmta})_5\text{NaK}_4\text{POM}]^{4-}(\text{CH}_3\text{CN})\text{CH}_3\text{OH}$                              | 2186.0       | 2186.5         |

## Section 5 Anticancer Activity Study

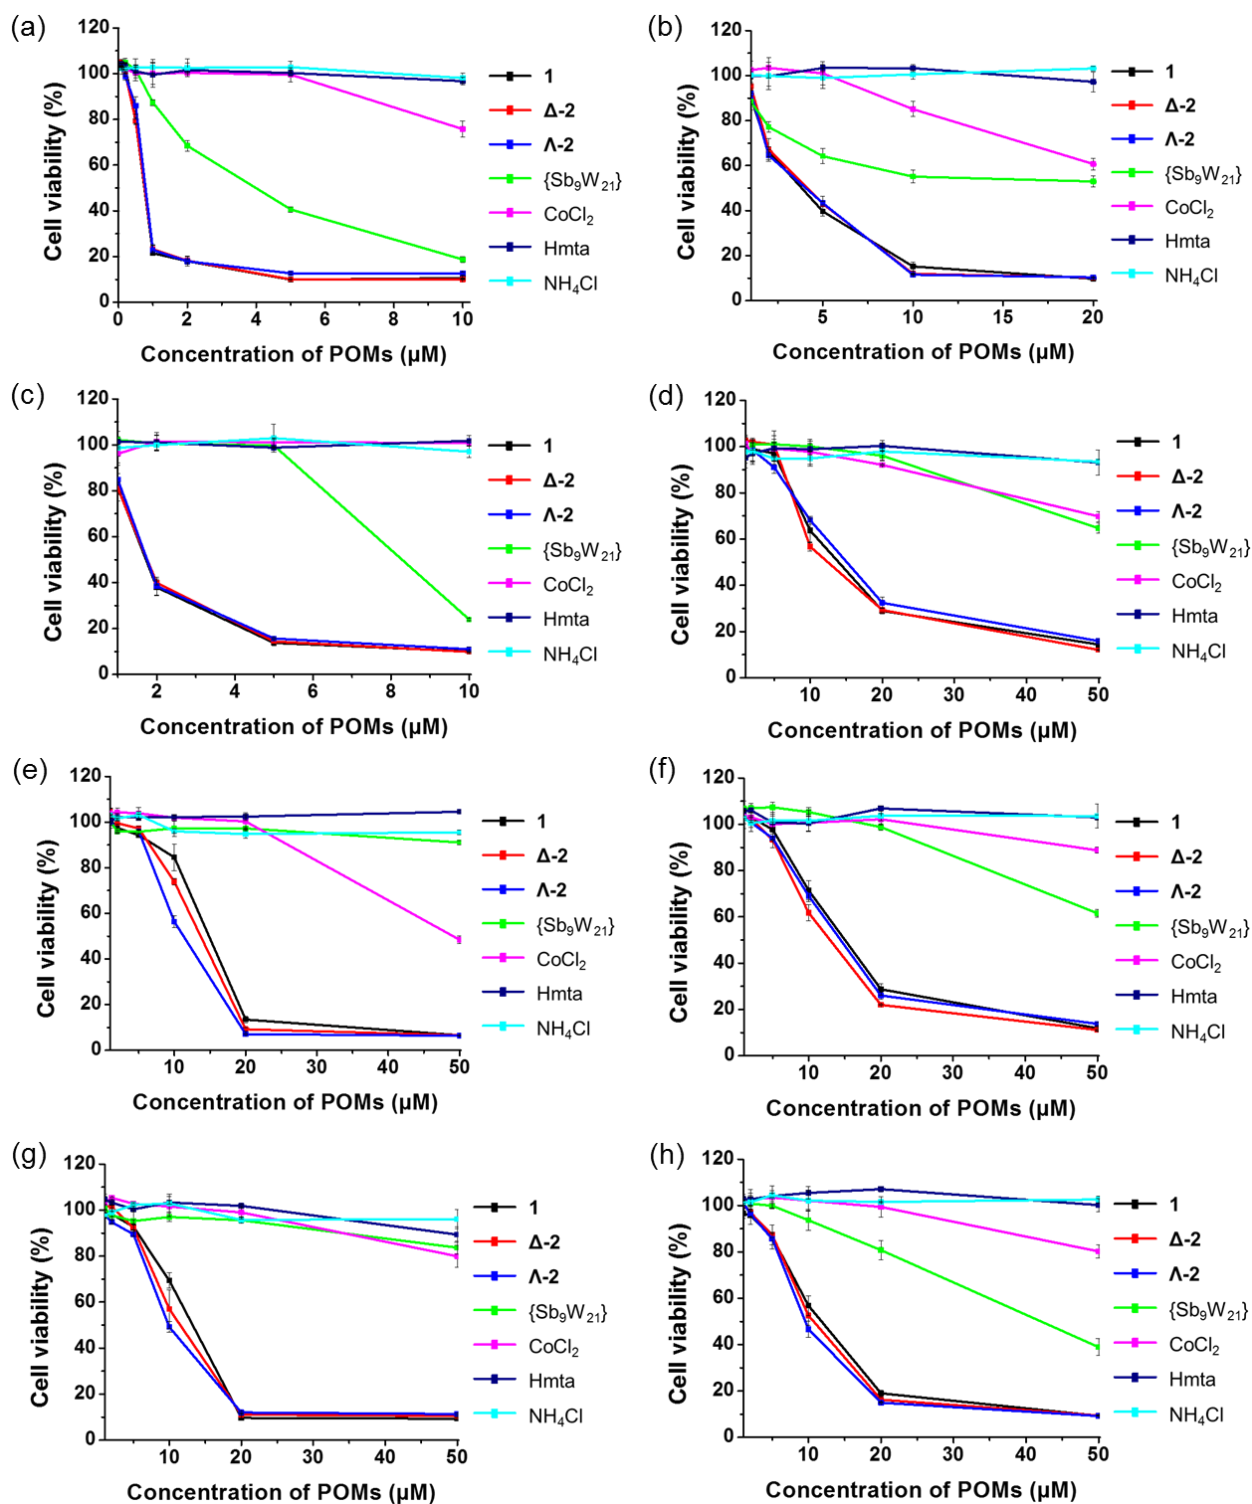

**Fig. S14** Cytotoxicity of POMs against (a) A2780, (b) A2780cisR, (c) OVCAR-3, (d) SKOV-3, (e) CT26, (f) HT29, (g) A549, and (i) MCF-7 cells, as determined by the MTS assay after incubation for 72 hours. The concentrations of CoCl<sub>2</sub>, Hmta, and NH<sub>4</sub>Cl were 5-, 10-, and 18-fold greater than that of the POMs, respectively.

**Table S3** IC<sub>50</sub> values (μM) of POMs against SKOV-3, CT26, HT29, A549 and MCF-7 cells after a 72-hour incubation, as determined by MTS assay. Data are expressed as means ± S.D. (n = 3).

|                                    | SKOV-3 cells | CT26 cells   | HT29 cells   | A549 cells   | MCF-7 cells  |
|------------------------------------|--------------|--------------|--------------|--------------|--------------|
| <b>1</b>                           | 15.02 ± 0.21 | 14.72 ± 0.77 | 15.60 ± 0.78 | 12.65 ± 0.41 | 12.24 ± 0.79 |
| <b>Δ-2</b>                         | 14.81 ± 0.46 | 12.98 ± 0.24 | 13.46 ± 0.41 | 10.99 ± 1.05 | 11.14 ± 0.90 |
| <b>Λ-2</b>                         | 15.71 ± 0.40 | 10.65 ± 0.32 | 14.87 ± 0.21 | 10.27 ± 0.36 | 10.01 ± 0.55 |
| {Sb <sub>9</sub> W <sub>21</sub> } | > 50         | > 50         | > 50         | > 50         | 43.72 ± 2.44 |

**Table S4** IC<sub>50</sub> values (μM) of CoCl<sub>2</sub>, Hmta, and NH<sub>4</sub>Cl against A2780, A2780cisR, OVCAR-3, SKOV-3, CT26, HT29, A549 and MCF-7 cells after a 72-hour incubation, as determined by MTS assay. Data are expressed as means ± S.D. (n = 3).

|                    | A2780 cells  | A2780cisR cells | OVCAR-3 cells | SKOV-3 cells | CT26 cells | HT29 cells | A549 cells | MCF-7 cells |
|--------------------|--------------|-----------------|---------------|--------------|------------|------------|------------|-------------|
| CoCl <sub>2</sub>  | 122.7 ± 3.21 | 114.6 ± 9.75    | > 250         | > 250        | ~250       | > 250      | > 250      | > 250       |
| Hmta               | > 500        | > 500           | > 500         | > 500        | > 500      | > 500      | > 500      | > 500       |
| NH <sub>4</sub> Cl | > 900        | > 900           | > 900         | > 900        | > 900      | > 900      | > 900      | > 900       |

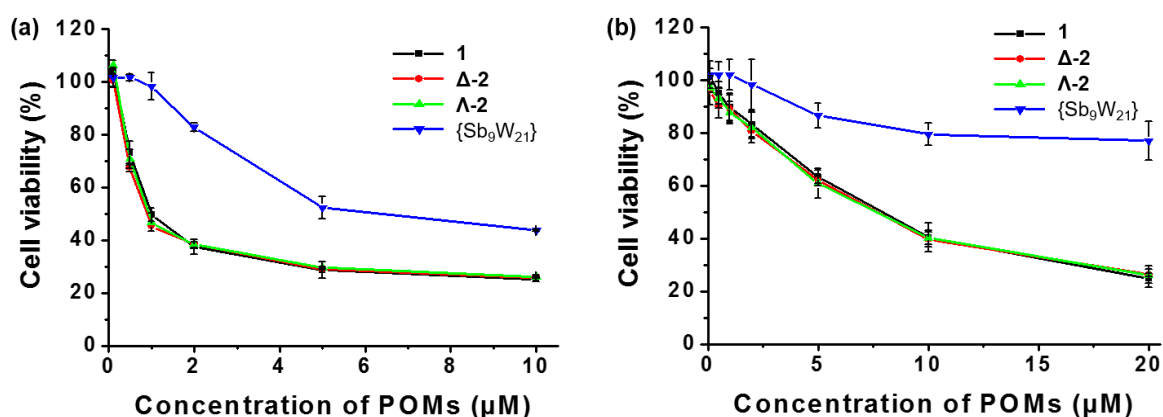

**Fig. S15** Cytotoxicity of POMs against (a) A2780 and (b) A2780cisR cells after a 24-hour incubation, as determined by MTS assay.

**Table S5** IC<sub>50</sub> values (μM) of POMs against A2780 and A2780cisR cells after a 24-hour incubation, as determined by MTS assay. Data are expressed as means ± S.D. (n = 3).

|                                    | A2780 cells | A2780cisR cells |
|------------------------------------|-------------|-----------------|
| <b>1</b>                           | 1.50 ± 0.10 | 9.54 ± 1.56     |
| <b>Δ-2</b>                         | 1.52 ± 0.10 | 9.72 ± 1.03     |
| <b>Λ-2</b>                         | 1.58 ± 0.20 | 9.61 ± 0.87     |
| {Sb <sub>9</sub> W <sub>21</sub> } | 8.02 ± 0.20 | 54.37 ± 4.00    |

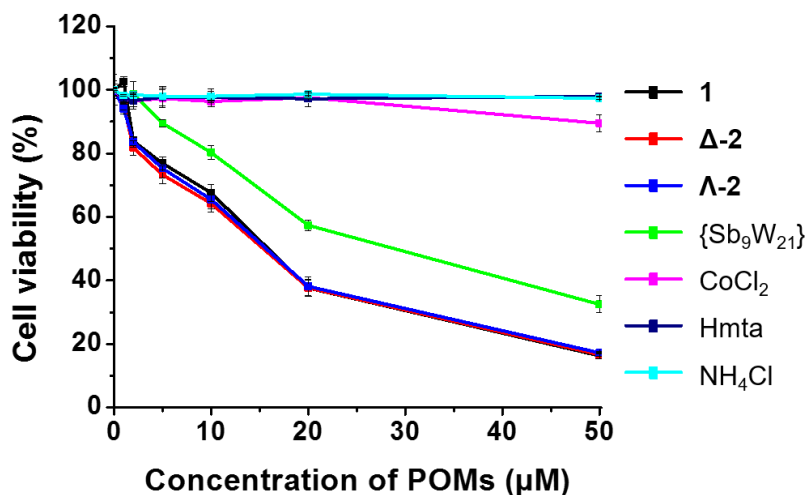

**Fig. S16** Cytotoxicity of POMs against HEK-293 cells after a 72-hour incubation, as determined by the MTS assay. The concentrations of CoCl<sub>2</sub>, Hmta, and NH<sub>4</sub>Cl were 5-, 10-, and 18-fold greater than that of the POMs, respectively.

**Table S6** IC<sub>50</sub> values (μM) of POMs, CoCl<sub>2</sub>, Hmta, and NH<sub>4</sub>Cl against HEK-293 cells after a 72-hour incubation, as determined by MTS assay. Data are expressed as means ± S.D. (n = 3).

| <b>1</b>     | <b>Δ-2</b>   | <b>Λ-2</b>   | {Sb <sub>9</sub> W <sub>21</sub> } | CoCl <sub>2</sub> | Hmta  | NH <sub>4</sub> Cl |
|--------------|--------------|--------------|------------------------------------|-------------------|-------|--------------------|
| 16.17 ± 0.83 | 16.08 ± 0.50 | 16.15 ± 1.21 | 34.47 ± 1.07                       | >250              | > 500 | > 900              |

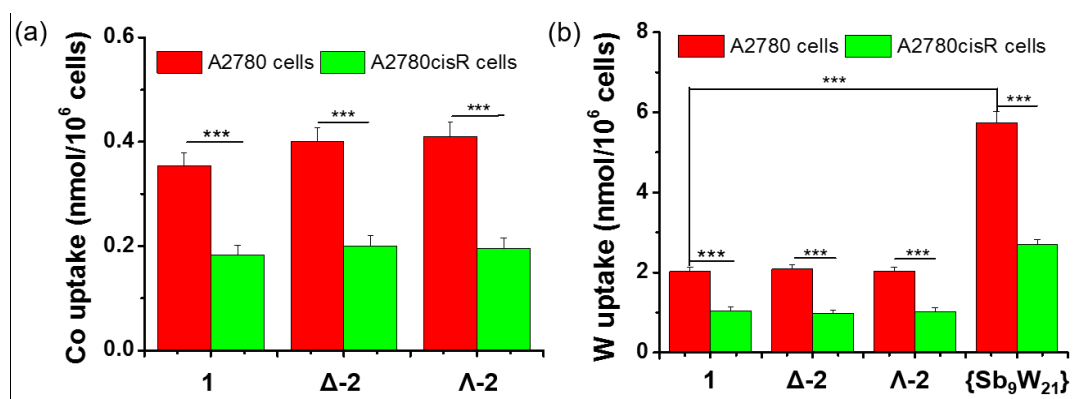

**Fig. S17** Uptake of (a) Co and (b) W by A2780 and A2780cisR cells incubated with POMs for 4 hours. Statistical significance: \*\*\* $P < 0.001$ .

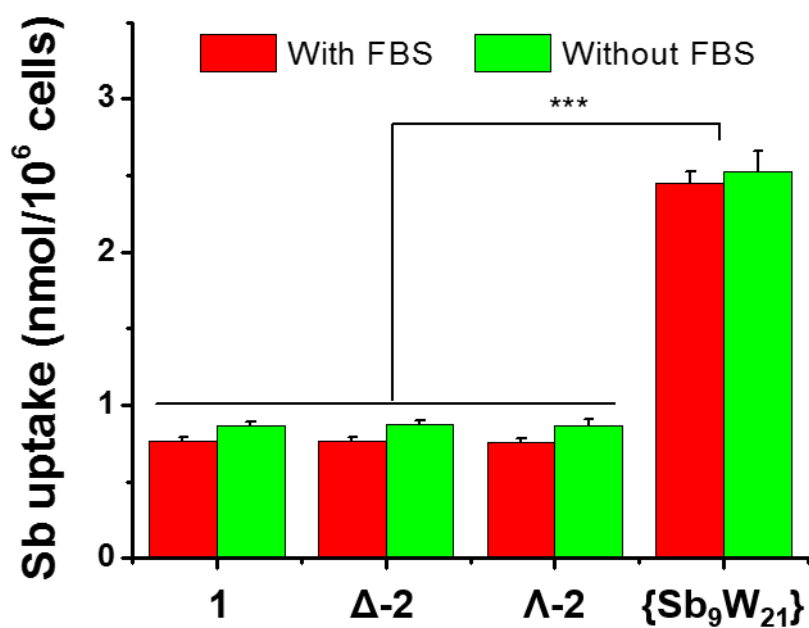

**Fig. S18** Uptake of Sb by A2780 cells incubated with POMs for 4 hours in the presence or absence of 10% FBS. Statistical significance: \*\*\* $P < 0.001$ .

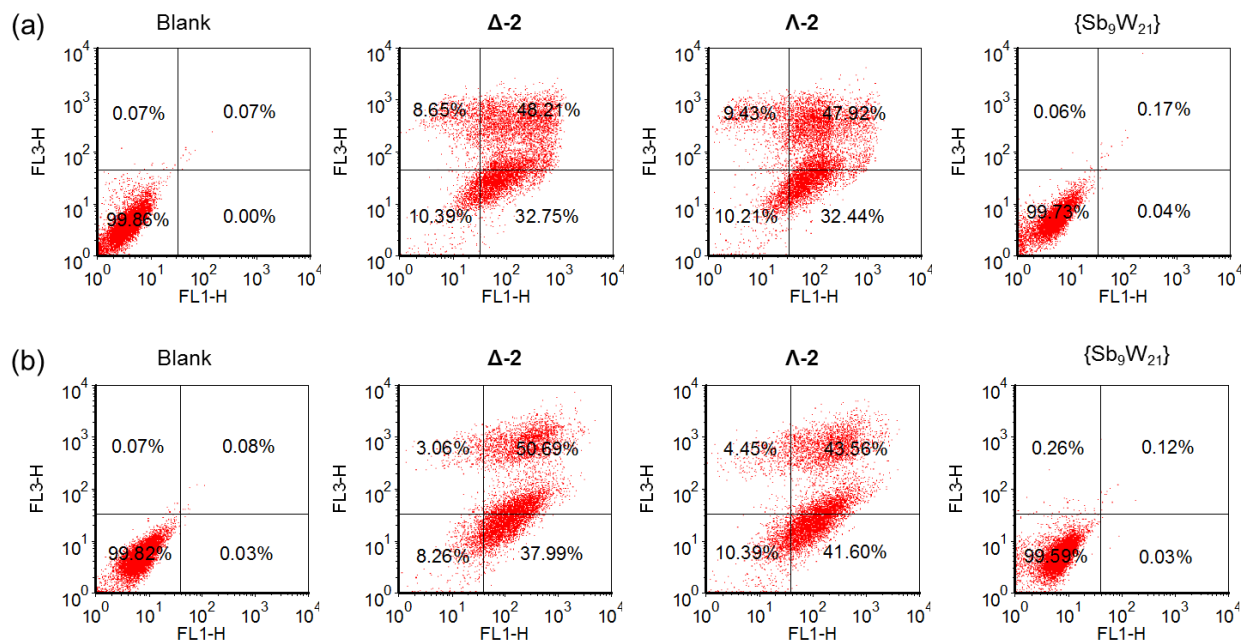

**Fig. S19** Annexin V/PI analysis of (a) A2780 and (b) A2780cisR cells after incubation with POMs for 24 hours. The quadrants from lower left to upper left (counter-clockwise) represent healthy, early apoptotic, late apoptotic, and necrotic cells, respectively. The percentage of cells in each quadrant is shown on the graphs.

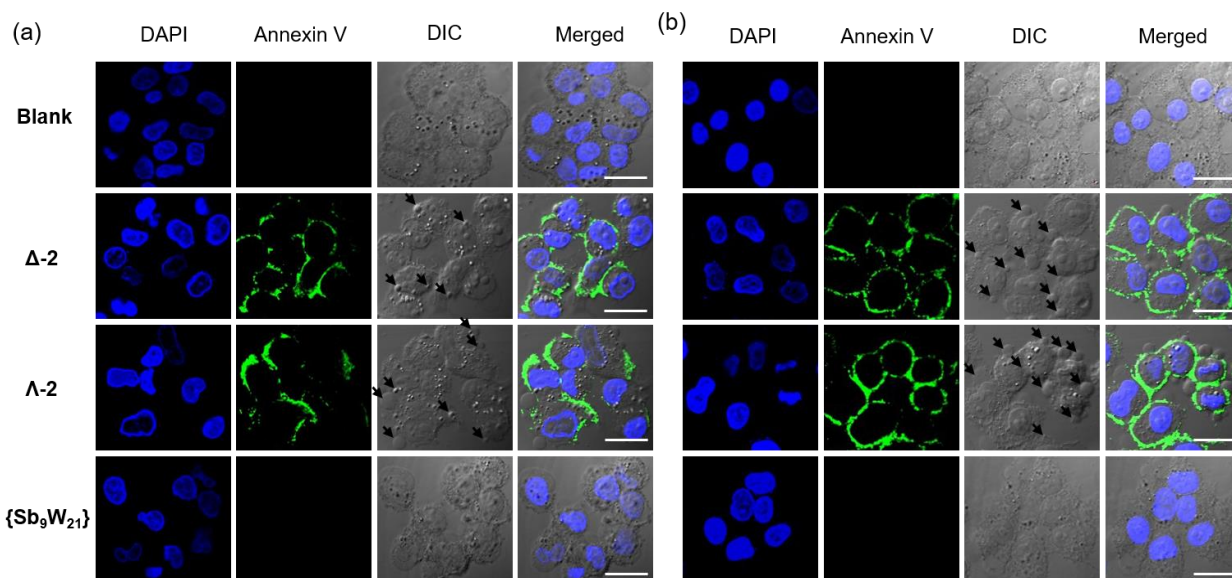

**Fig. S20** CLSM images showing cell apoptosis induced by Δ-2, Λ-2, and {Sb<sub>9</sub>W<sub>21</sub>} in (a) A2780 and (b) A2780cisR cells. Scale bars=20 μM.

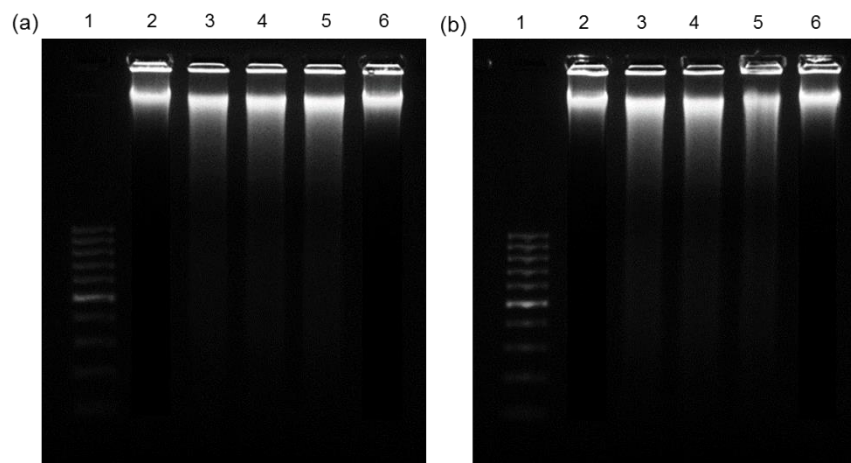

**Fig. S21** Analyses of DNA ladders on 2% (w/v) agarose gel at 35 V for 3 hours after DNA extraction from (a) A2780 and (b) A2780cisR cells treated with POMs. Lanes 1-6 show DNA marker, blank,  $\Delta$ -2,  $\Lambda$ -2, and  $\{\text{Sb}_9\text{W}_{21}\}$ , respectively.

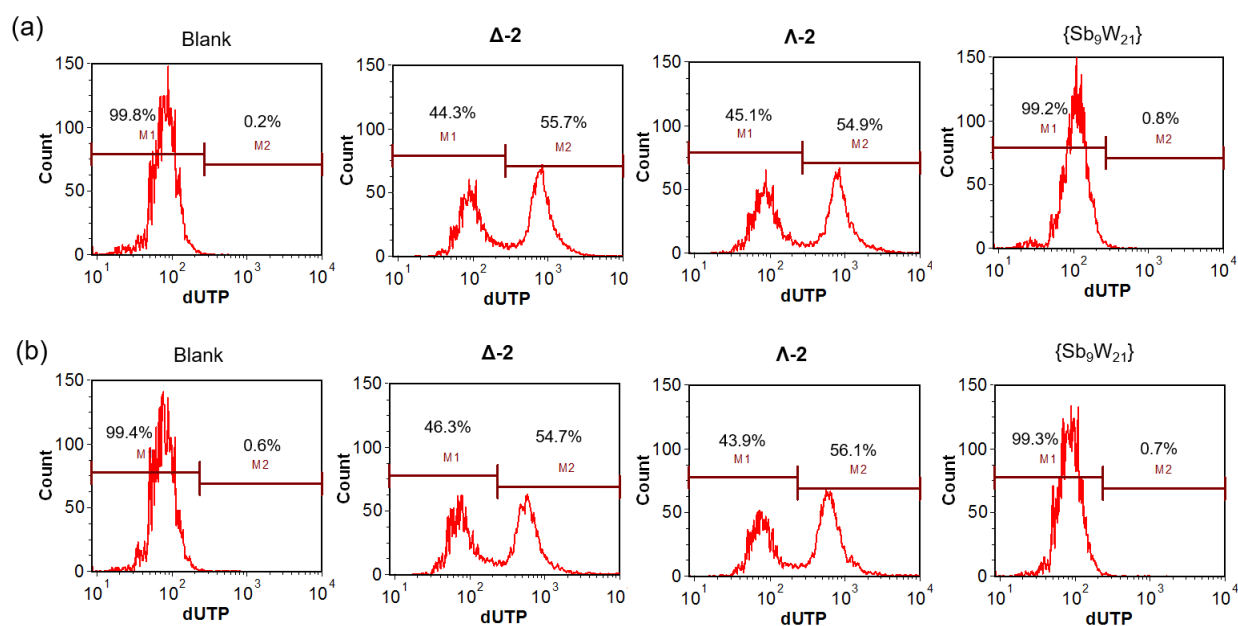

**Fig. S22** Flow cytometric analysis of apoptotic and non-apoptotic populations of A2780 and A2780cisR cells treated with POMs by TUNEL assay.



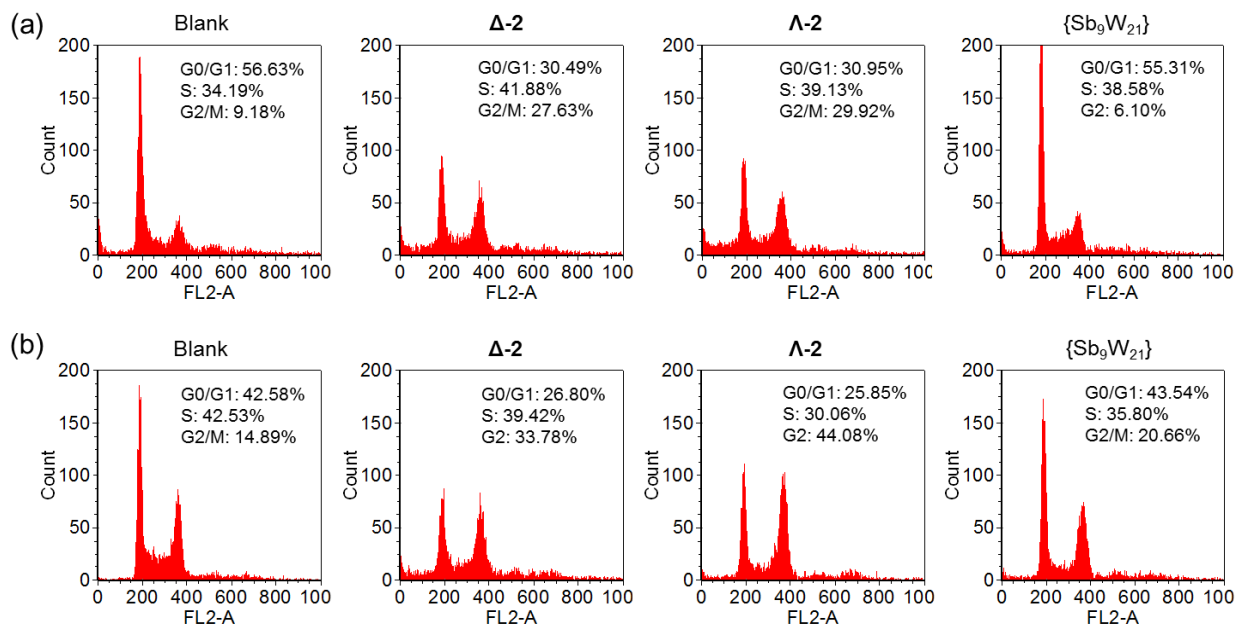

**Fig. S23** Cell cycle analysis of (a) A2780 and (b) A2780cisR cells incubated with POMs for 24 hours.

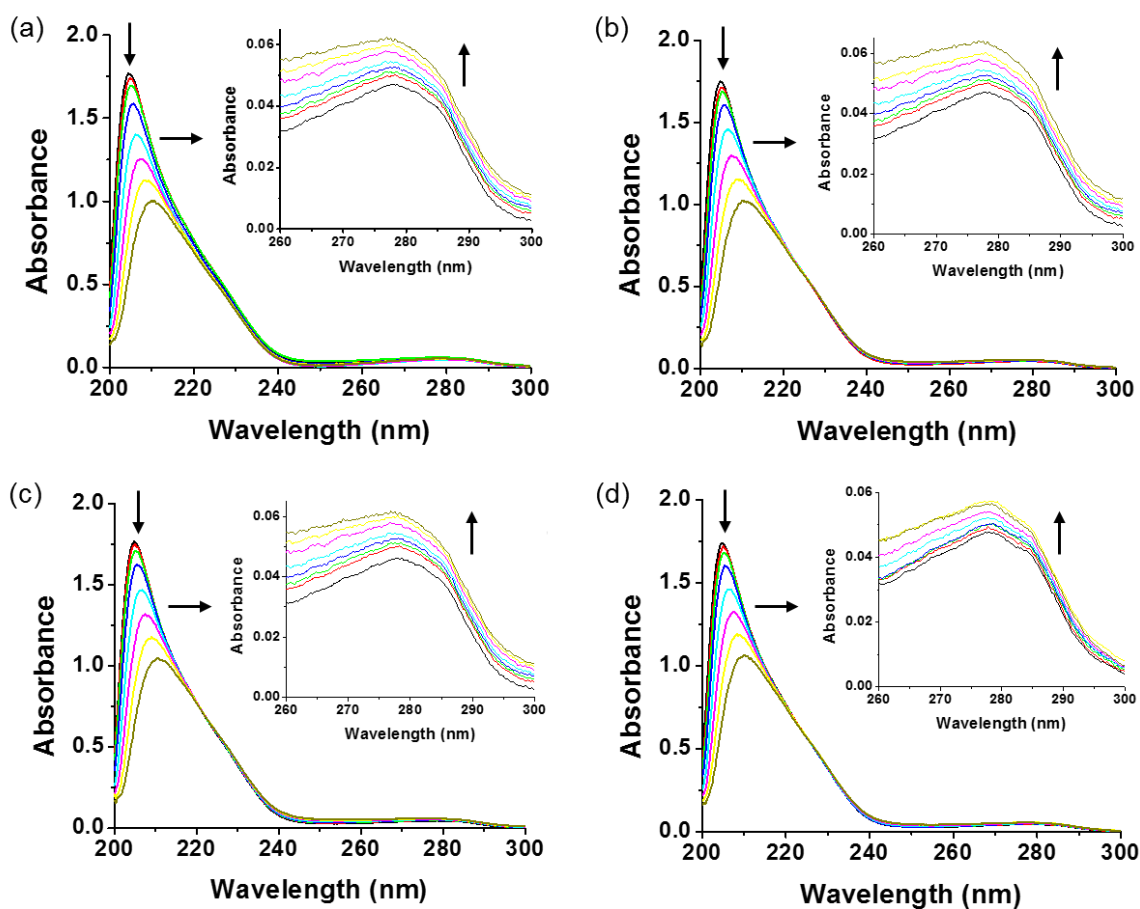

**Fig. S24** The UV-vis spectra of BSA after titration with (a) **1**, (b)  $\Delta$ -2, (c)  $\Lambda$ -2, and (d)  $\{Sb_9W_{21}\}$ , respectively.

**Table S7** Changes in the UV-vis spectra of BSA after titration with **1**,  $\Delta$ -**2**,  $\Lambda$ -**2**, and  $\{\text{Sb}_9\text{W}_{21}\}$ .

|                                | 204 nm       |           | 280 nm       |
|--------------------------------|--------------|-----------|--------------|
|                                | $\Delta A/A$ | Red-shift | $\Delta A/A$ |
| <b>1</b>                       | -43.3%       | 5.4       | 32.8%        |
| $\Delta$ - <b>2</b>            | -41.6%       | 5.5       | 35.5%        |
| $\Lambda$ - <b>2</b>           | -40.7%       | 5.9       | 34.3%        |
| $\{\text{Sb}_9\text{W}_{21}\}$ | -38.8%       | 5.3       | 18.2%        |

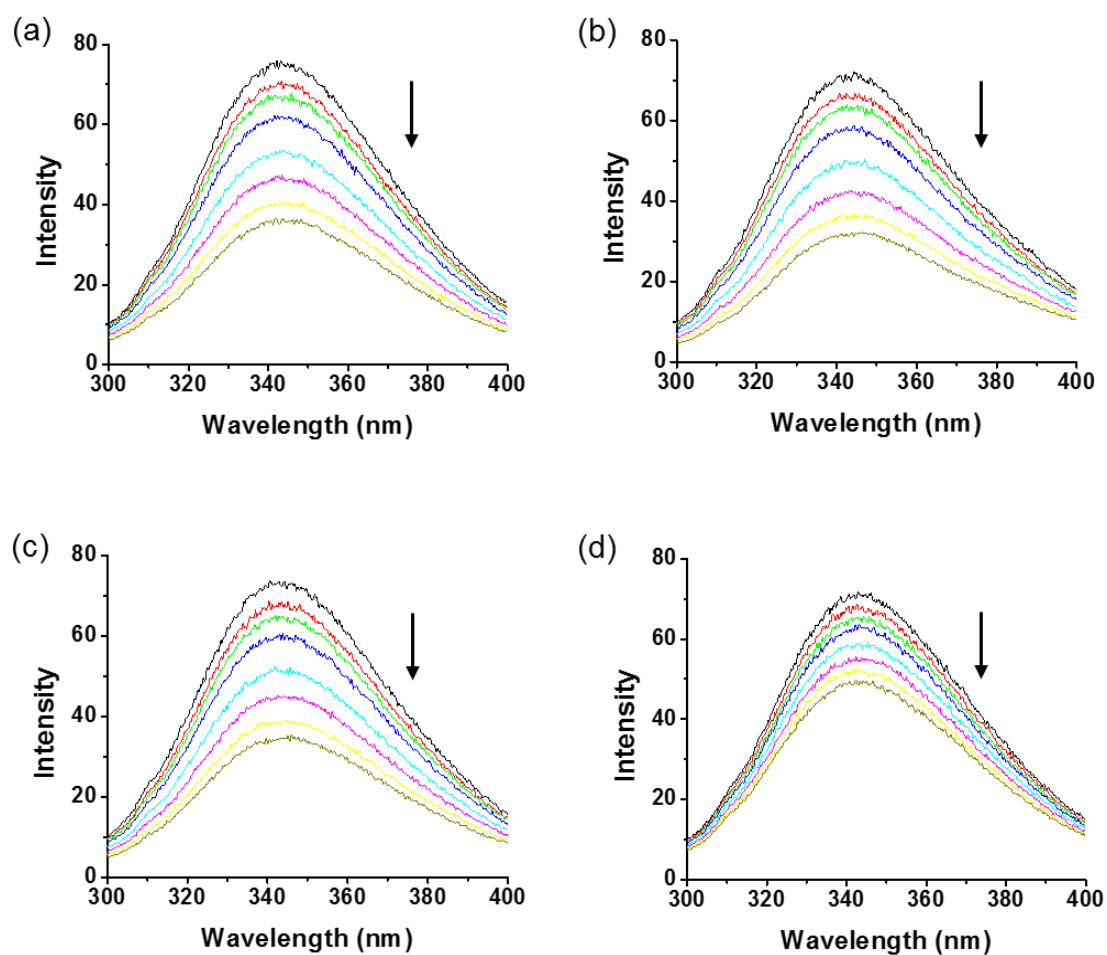

**Fig. S25** Fluorescence intensity of BSA after titration with (a) **1**, (b)  $\Delta$ -**2**, (c)  $\Lambda$ -**2**, and (d)  $\{\text{Sb}_9\text{W}_{21}\}$ .

**Table S8** Stern-Völmer quenching constants of the POM-BSA systems.

|                                       | Linear regression equation            | R      | $K_{SV}$ (L/mol)              | $K_q$ [L/(mol s)]                |
|---------------------------------------|---------------------------------------|--------|-------------------------------|----------------------------------|
| <b>1</b>                              | $F_0/F = 1.01 + 1.02 \times 10^5 [Q]$ | 0.9991 | $(1.02 \pm 0.03) \times 10^5$ | $(1.02 \pm 0.03) \times 10^{13}$ |
| <b><math>\Delta</math>-2</b>          | $F_0/F = 1.01 + 1.18 \times 10^5 [Q]$ | 0.9987 | $(1.18 \pm 0.21) \times 10^5$ | $(1.18 \pm 0.21) \times 10^{13}$ |
| <b><math>\Lambda</math>-2</b>         | $F_0/F = 1.01 + 1.11 \times 10^5 [Q]$ | 0.9991 | $(1.11 \pm 0.89) \times 10^5$ | $(1.11 \pm 0.89) \times 10^{13}$ |
| <b>{Sb<sub>9</sub>W<sub>21</sub>}</b> | $F_0/F = 1.03 + 0.45 \times 10^5 [Q]$ | 0.9986 | $(0.45 \pm 0.06) \times 10^5$ | $(0.45 \pm 0.06) \times 10^{13}$ |

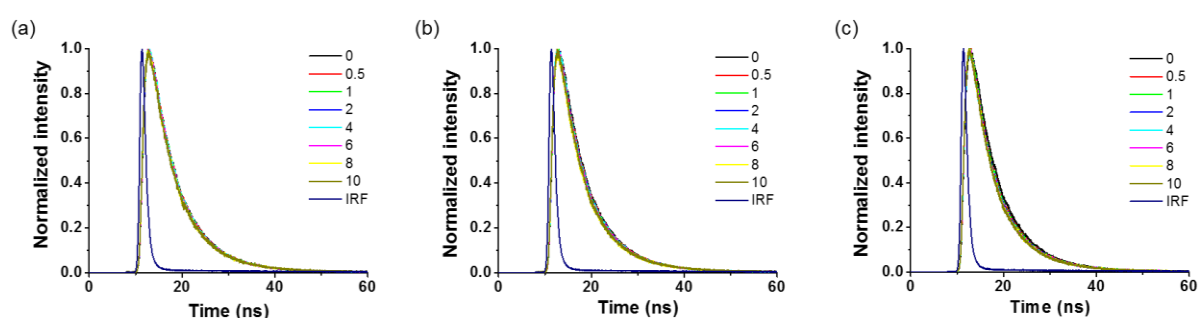**Fig. S26** Time-resolved fluorescence decay traces of BSA titrated with (a)  $\Delta$ -2, (b)  $\Lambda$ -2, and (c) {Sb<sub>9</sub>W<sub>21</sub>}. The molar ratio of POMs to BSA was 0-10.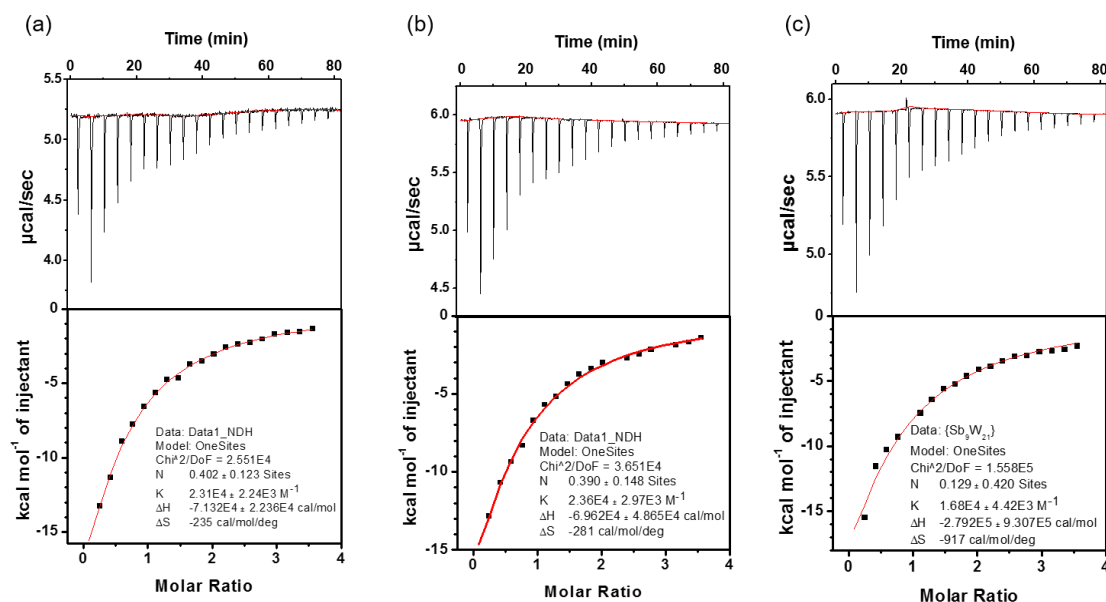**Fig. S27** Calorimetric data for the titration of BSA with (a)  $\Delta$ -2, (b)  $\Lambda$ -2, and (c) {Sb<sub>9</sub>W<sub>21</sub>}. The binding isotherm (heat change vs POM/BSA molar ratio) was obtained from the integration of raw data and fitted to a “one-site” model.
